# Supplementary material
Source: PubMed Central journal article supplement (PMC7282906)
Supplement: rspb20200443supp1.pdf [file rspb20200443supp1.pdf]

Martijn J.T.N. Timmermans, Amrita Srivathsan, Steve Collins, Rudolf Meier, Alfried P. Vogler.  
Mimicry diversification in *Papilio dardanus* via a genomic inversion in the regulatory region of  
*engrailed-inverted*. Proceedings of the Royal Society B. DOI: 10.1098/rspb.2020.0443

**Electronic supplementary material**

**Figure S1-S8**

**Table S1-4**

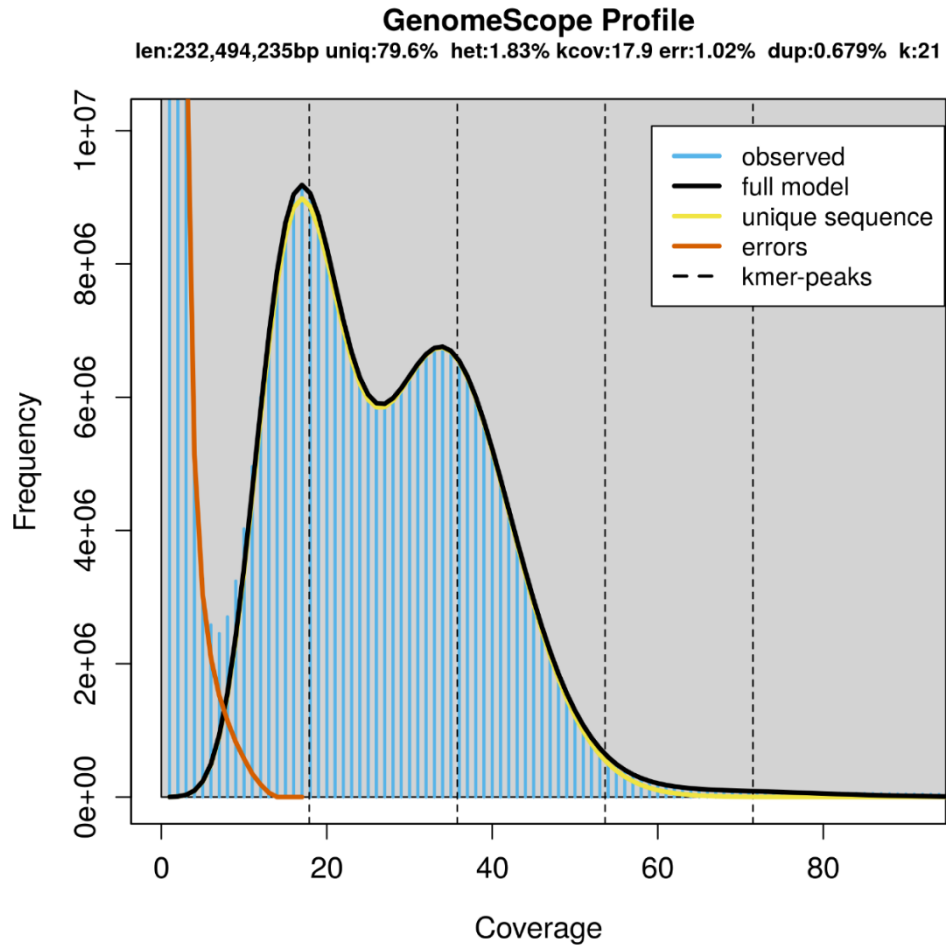

**Figure S1: Estimate of genome size using K-mer count.** Profile was obtained using GenomeScope.

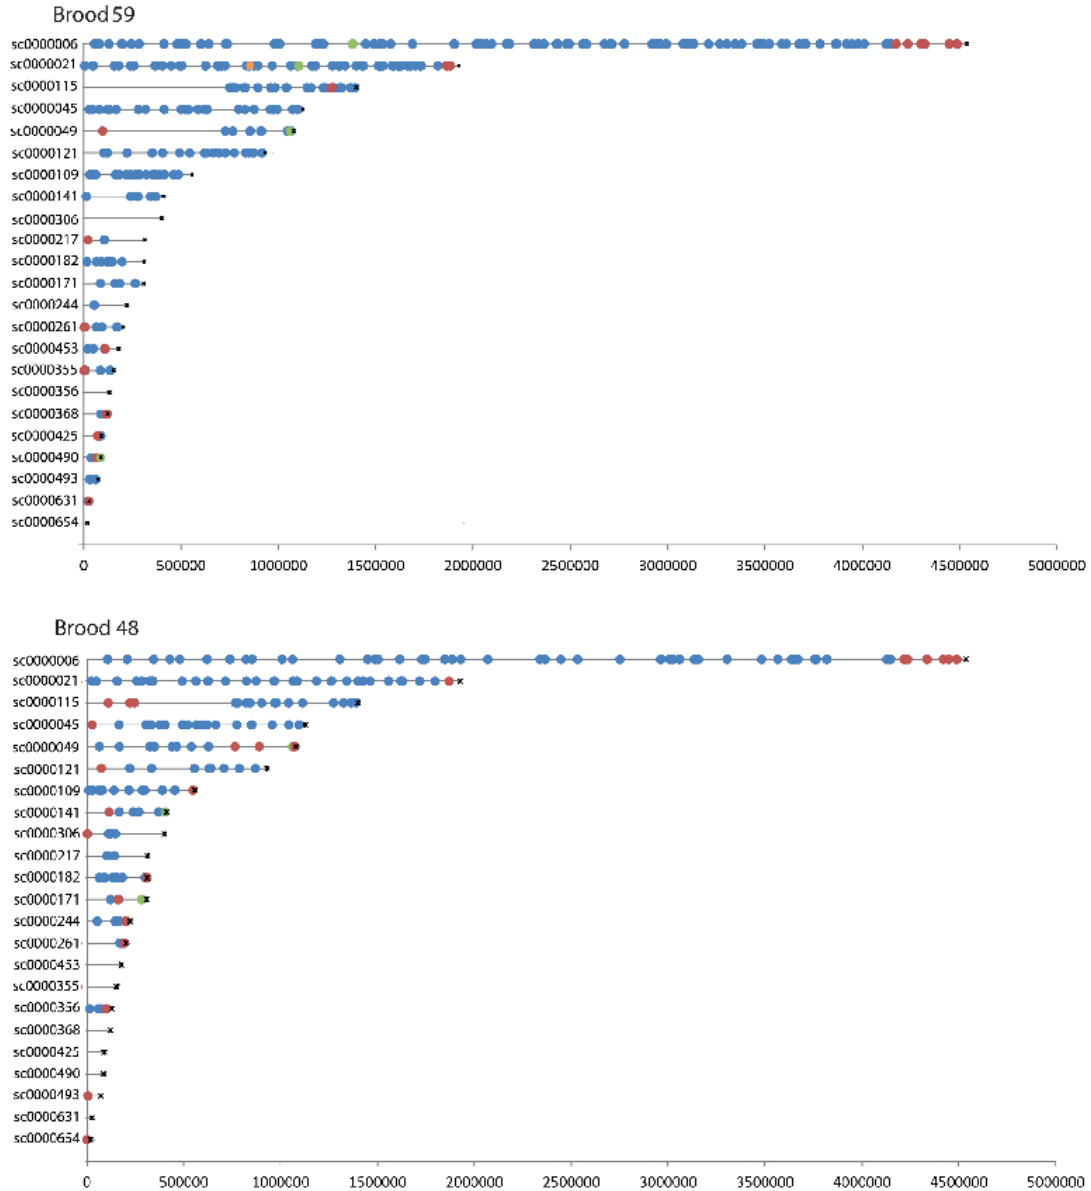

**Figure S2: Scaffolds with deviating SNP patterns for the two pedigree broods.** Top: Brood 59, Bottom: Brood 48. Vertical axis: scaffolds flagged up as being misassembled. Horizontal axis: scaffold length (bp). Colored dots represent SNPs. Blue dots: SNPs showing most frequent pattern. Other colors: SNPs deviating from the most frequent pattern.

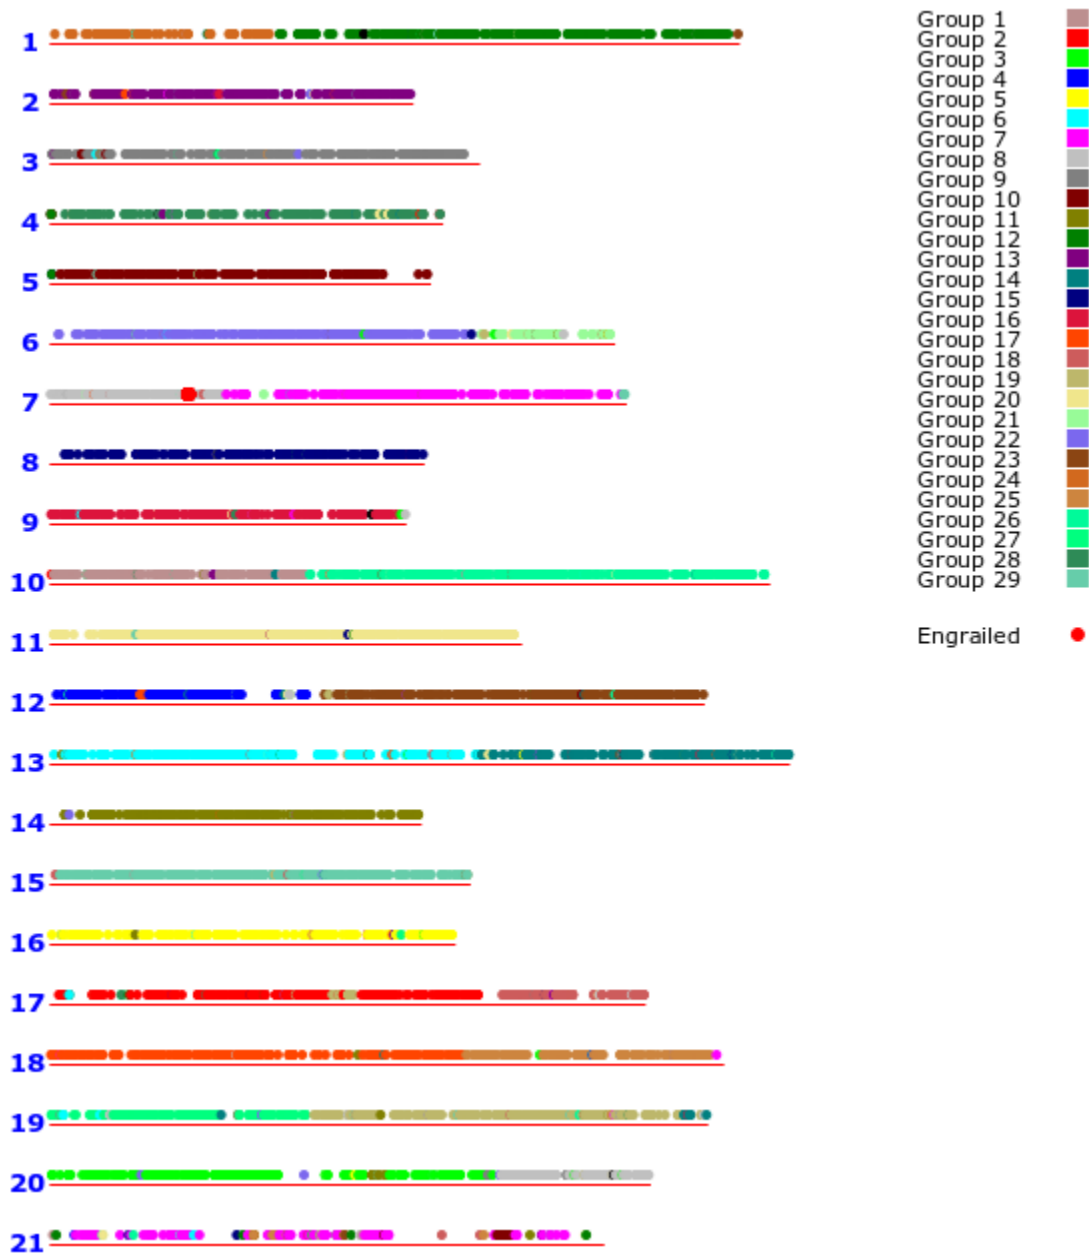

**Figure S3: Comparison between *P. dardanus* draft assembly and *Heliconius melpomene* genome.** BLAST matches between *P. dardanus* and *H. melpomene* are visualised on the *H. melpomene* genome map. *H. melpomene* 21 chromosomes are indicated with red lines. Colored circles indicate positions of *P. dardanus* predicted proteins that show homology to a *H. melpomene* gene. Predicted proteins from similar linkage groups ('chromosome bins') are given identical colors. The transcription factor *engrailed* is part of linkage group 8. In most cases the *P. dardanus* scaffolds within a chromosome bin also mapped to a single chromosome in *H. melpomene*. One exception is *P. dardanus* linkage group 7, which showed similarity to *H. melpomene* chromosome 7 and its Z chromosome (= *H. melpomene* chromosome 21).

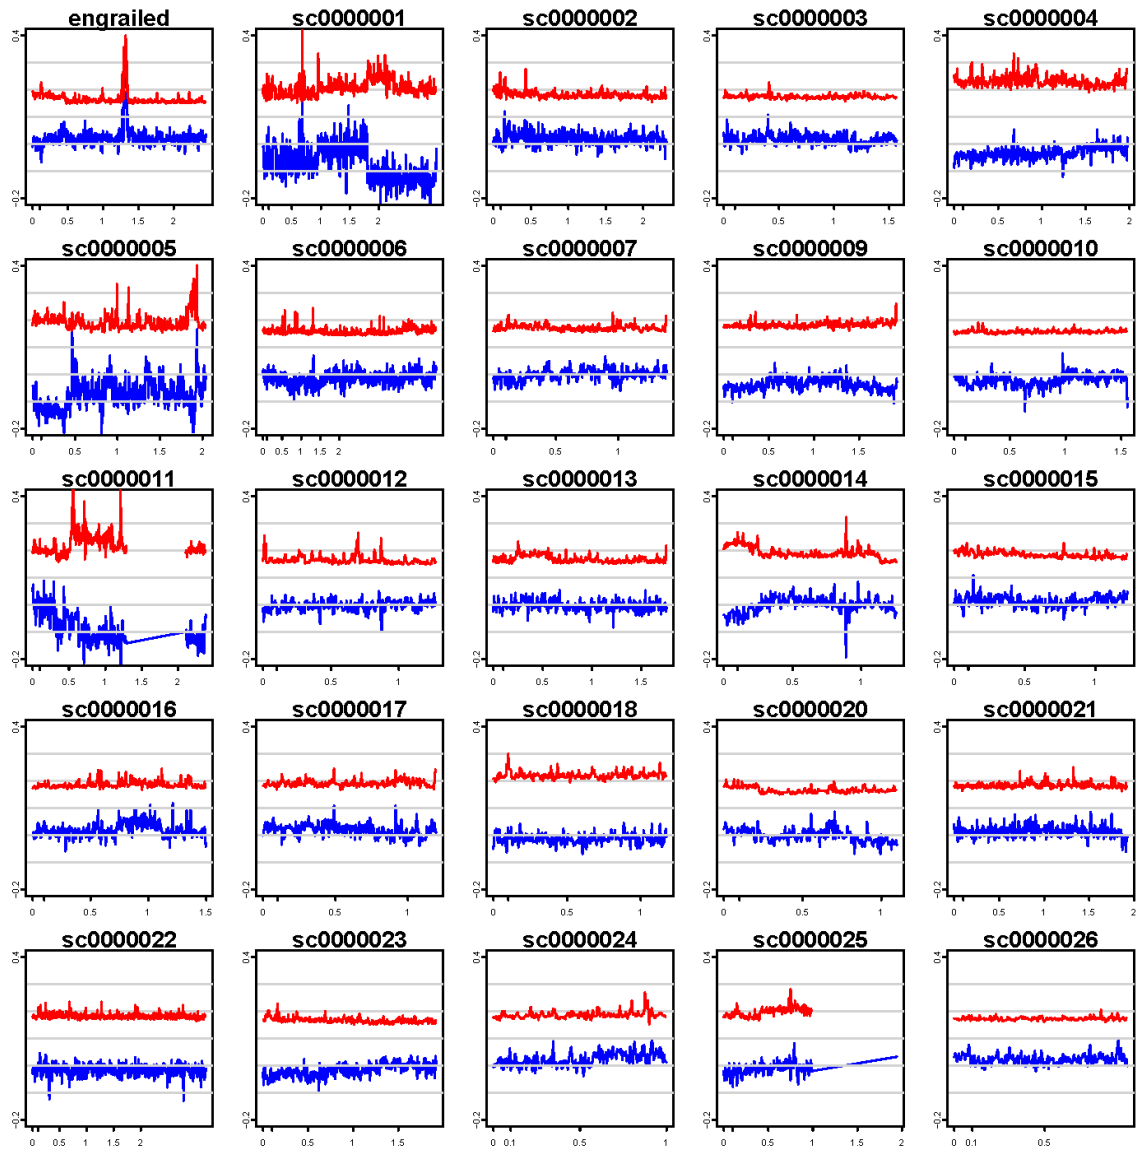

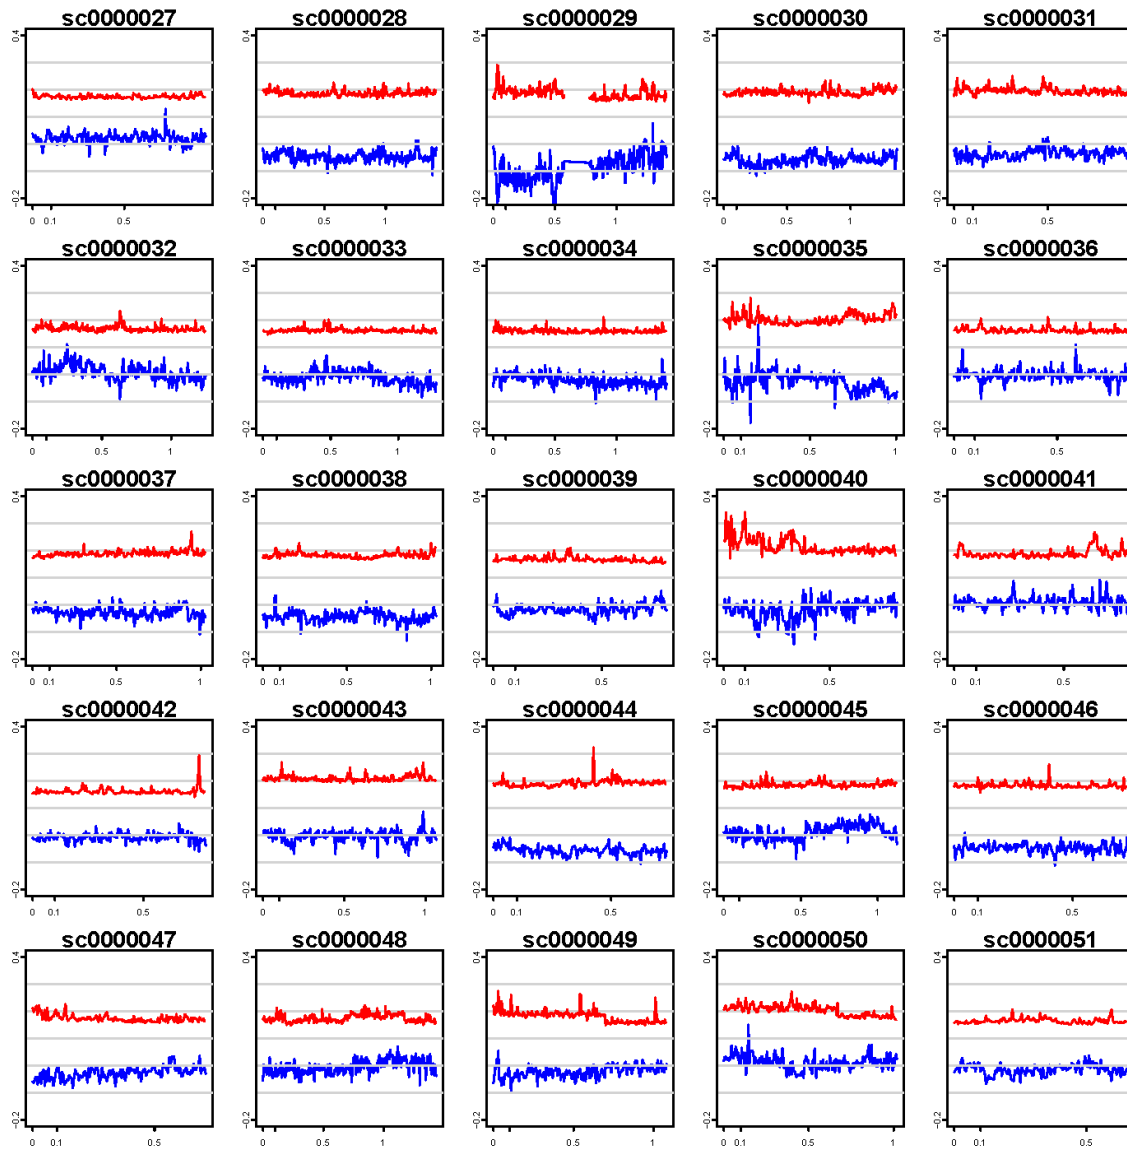

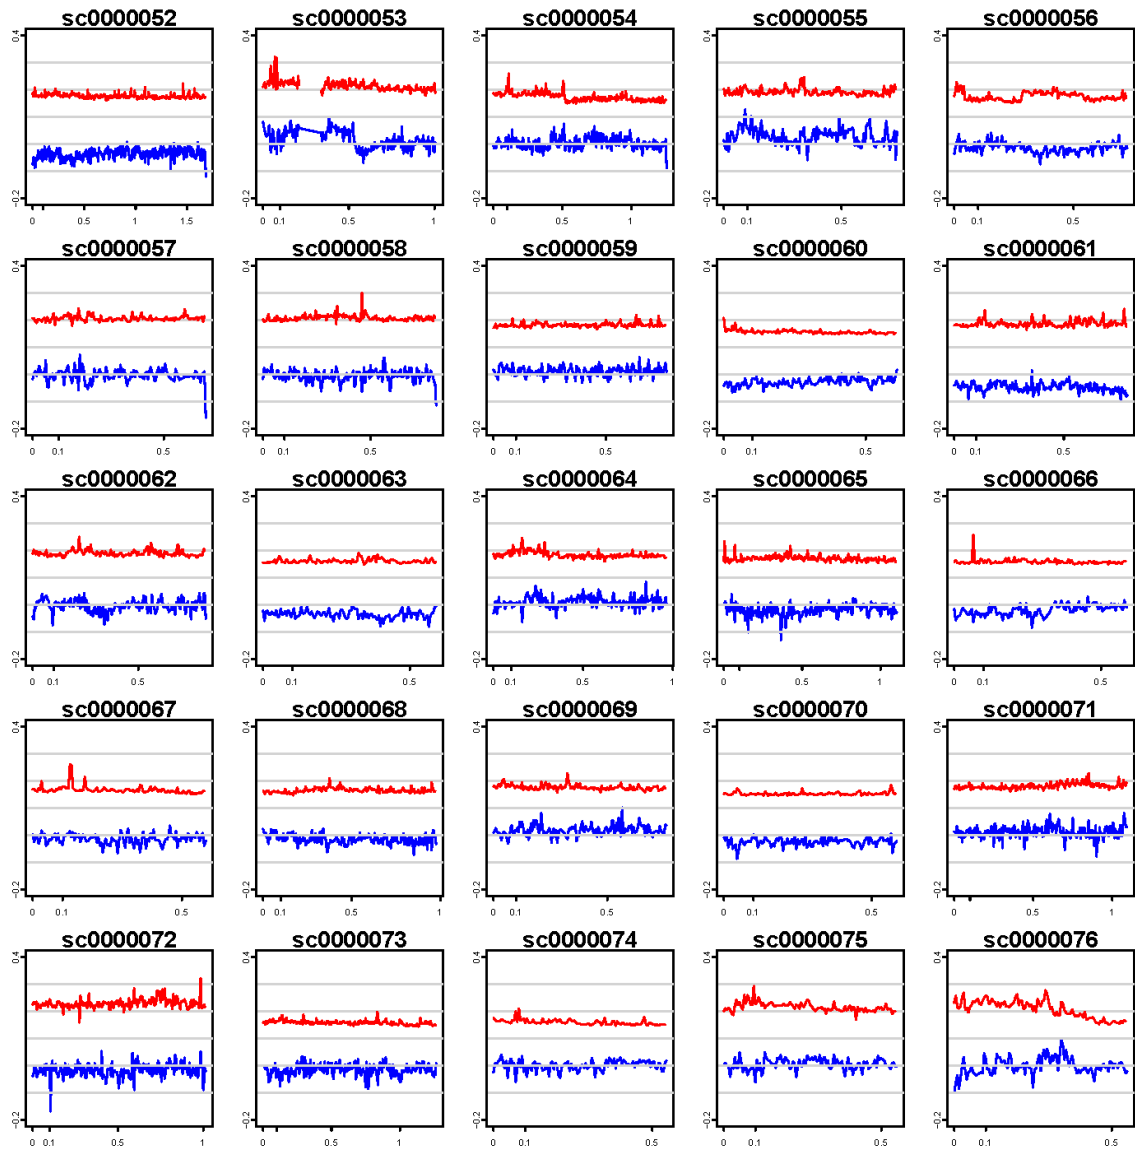

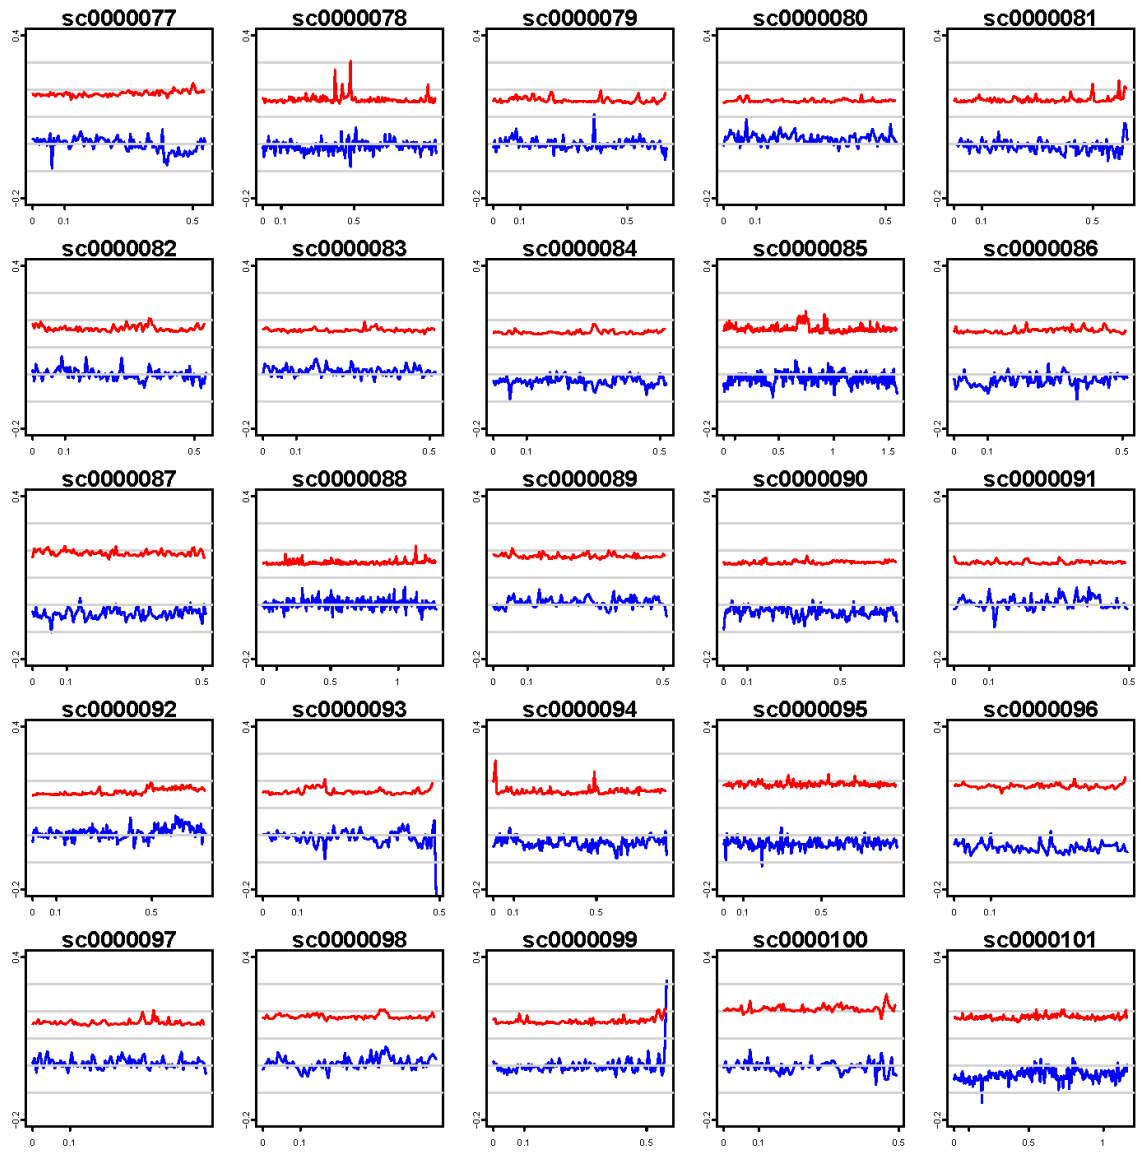



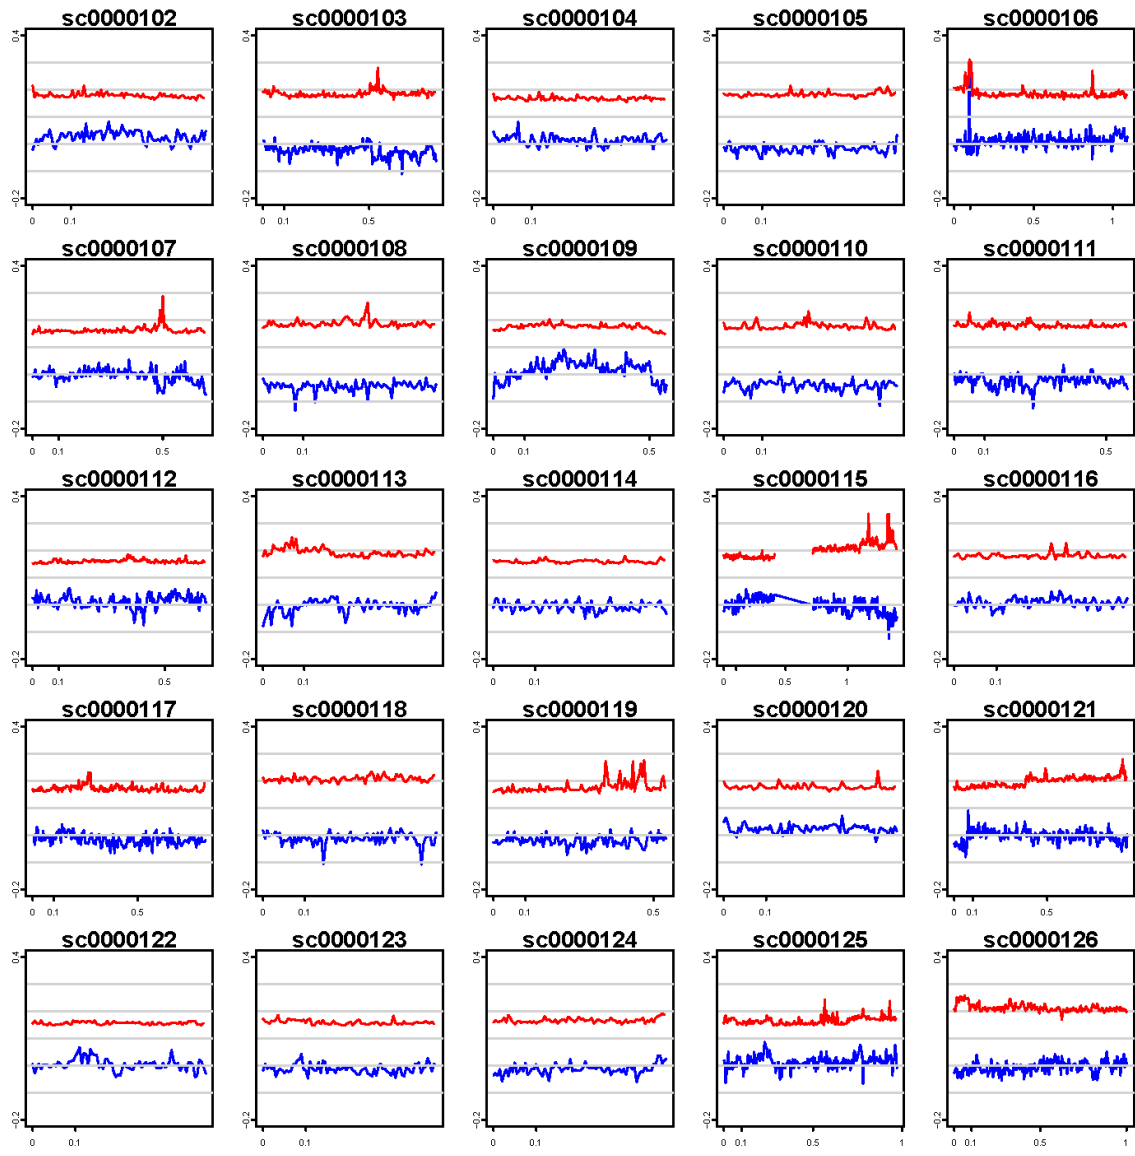

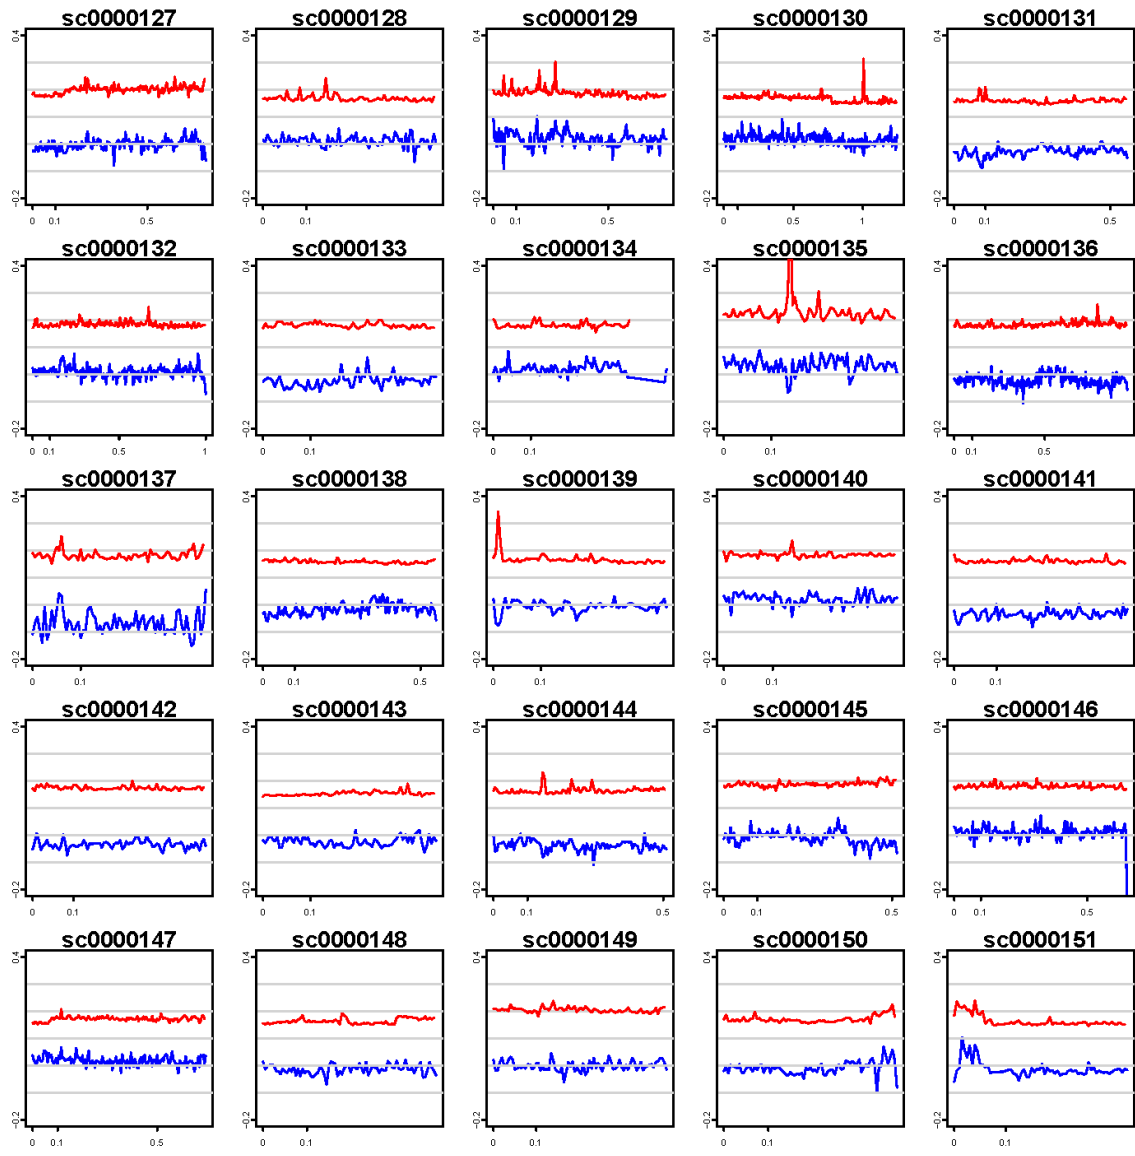

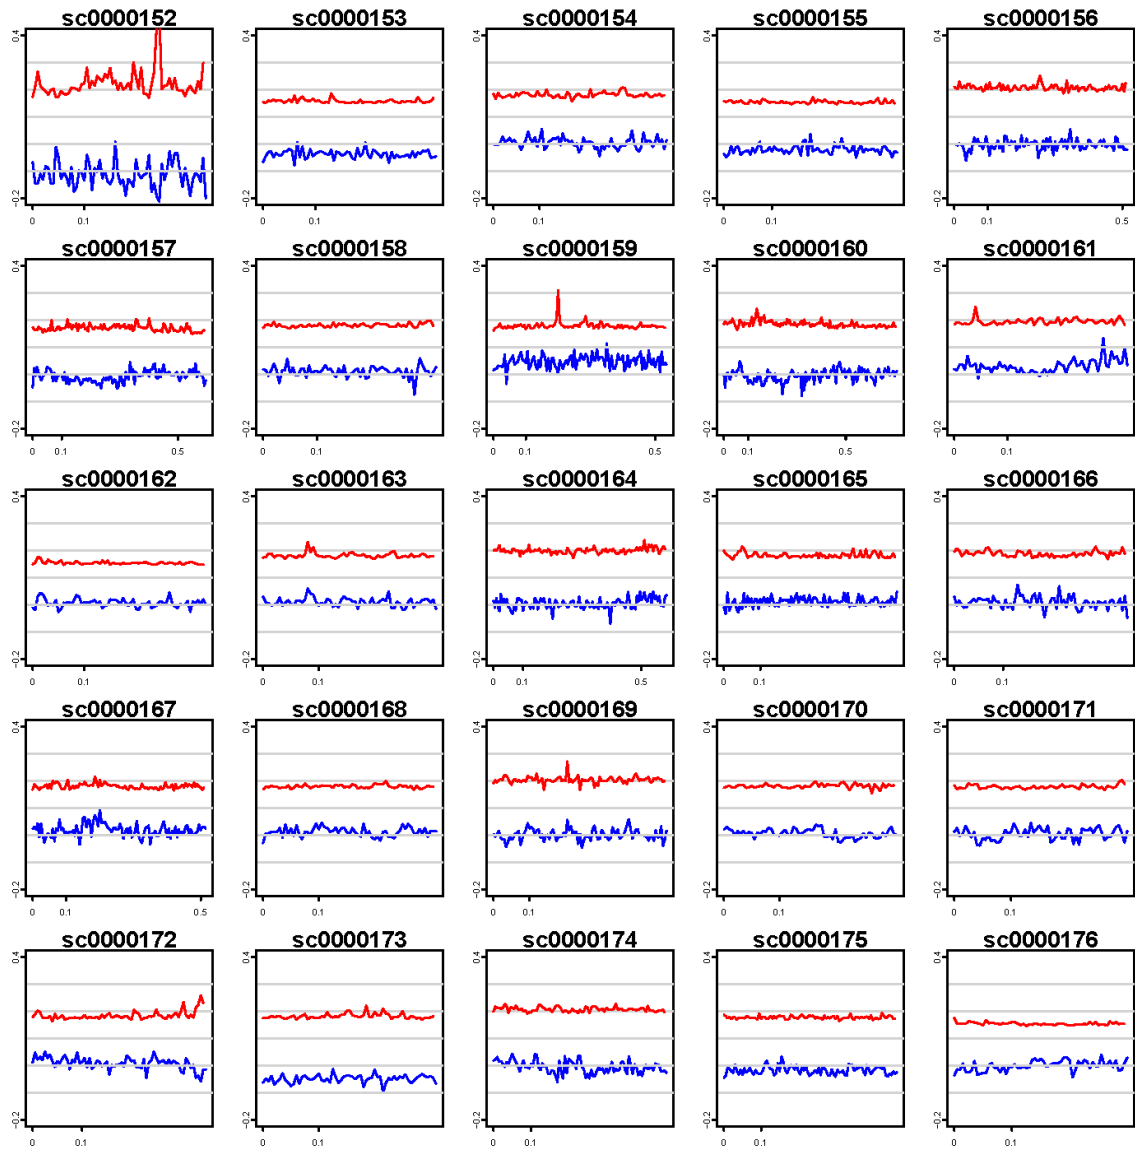

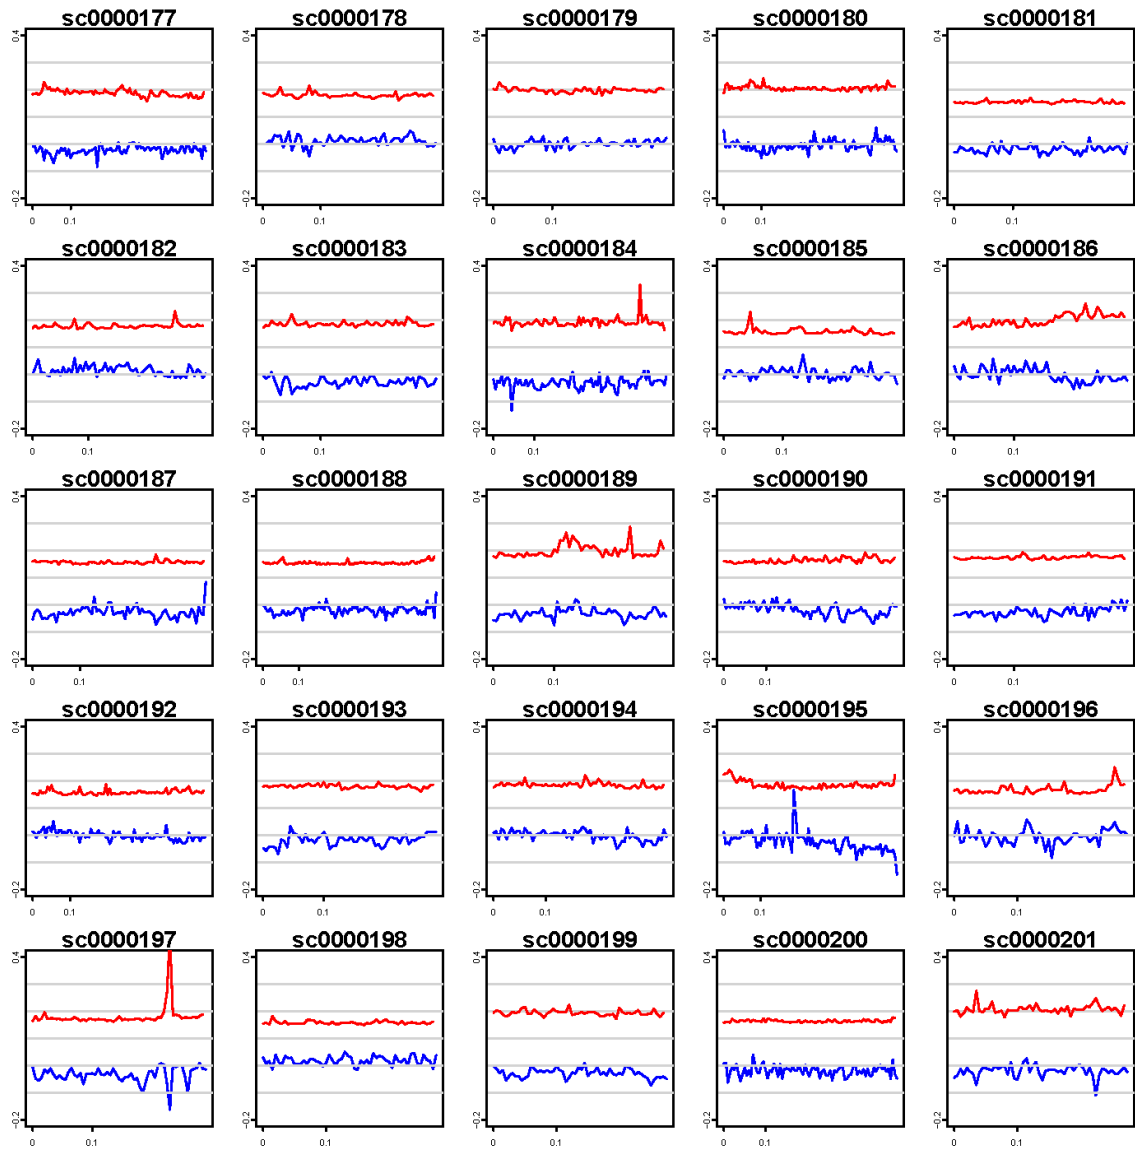

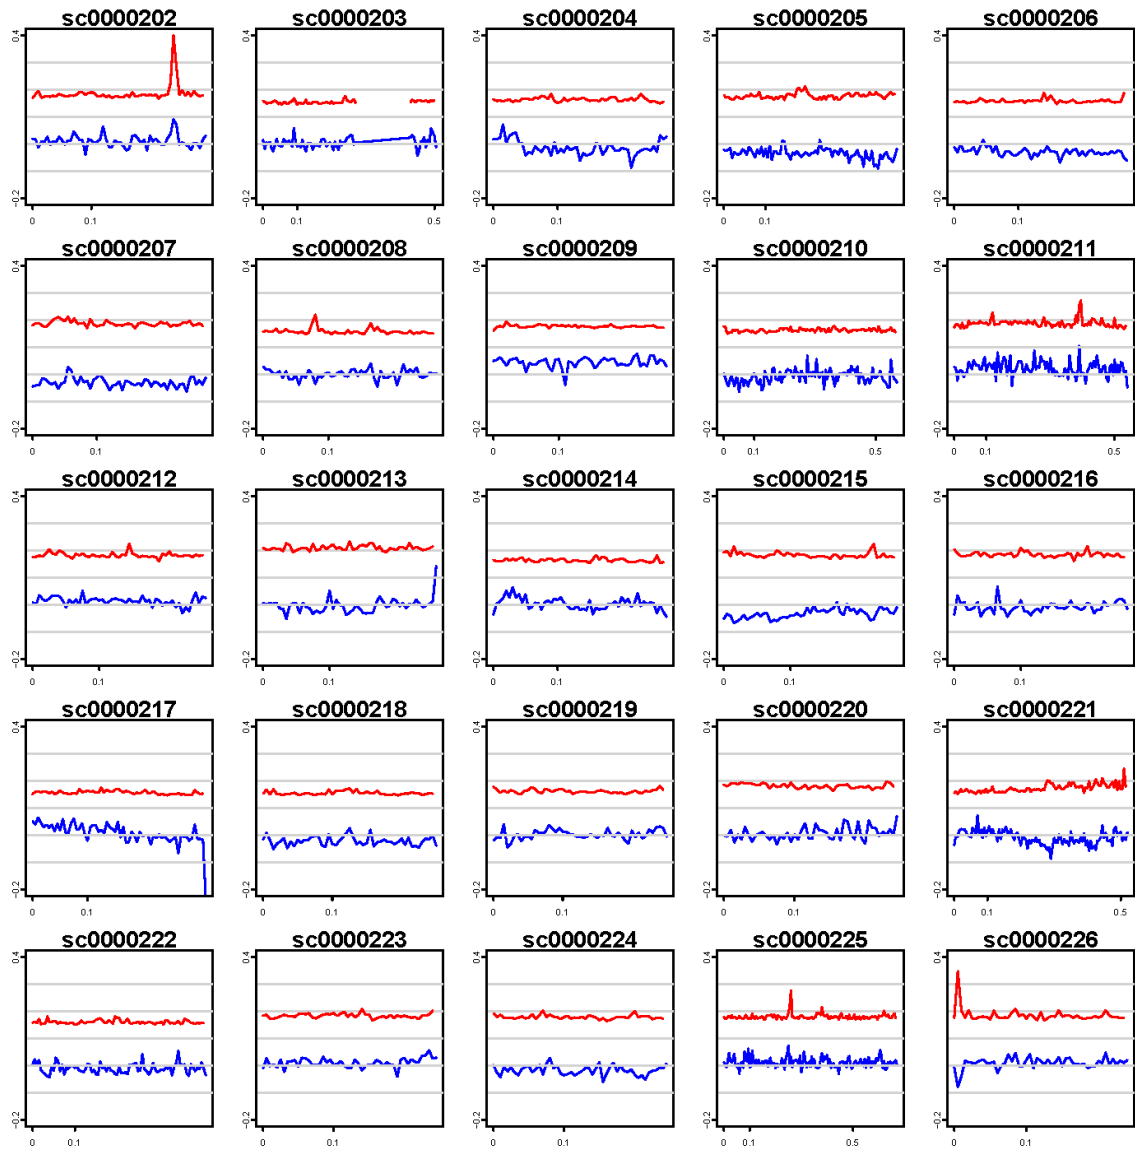

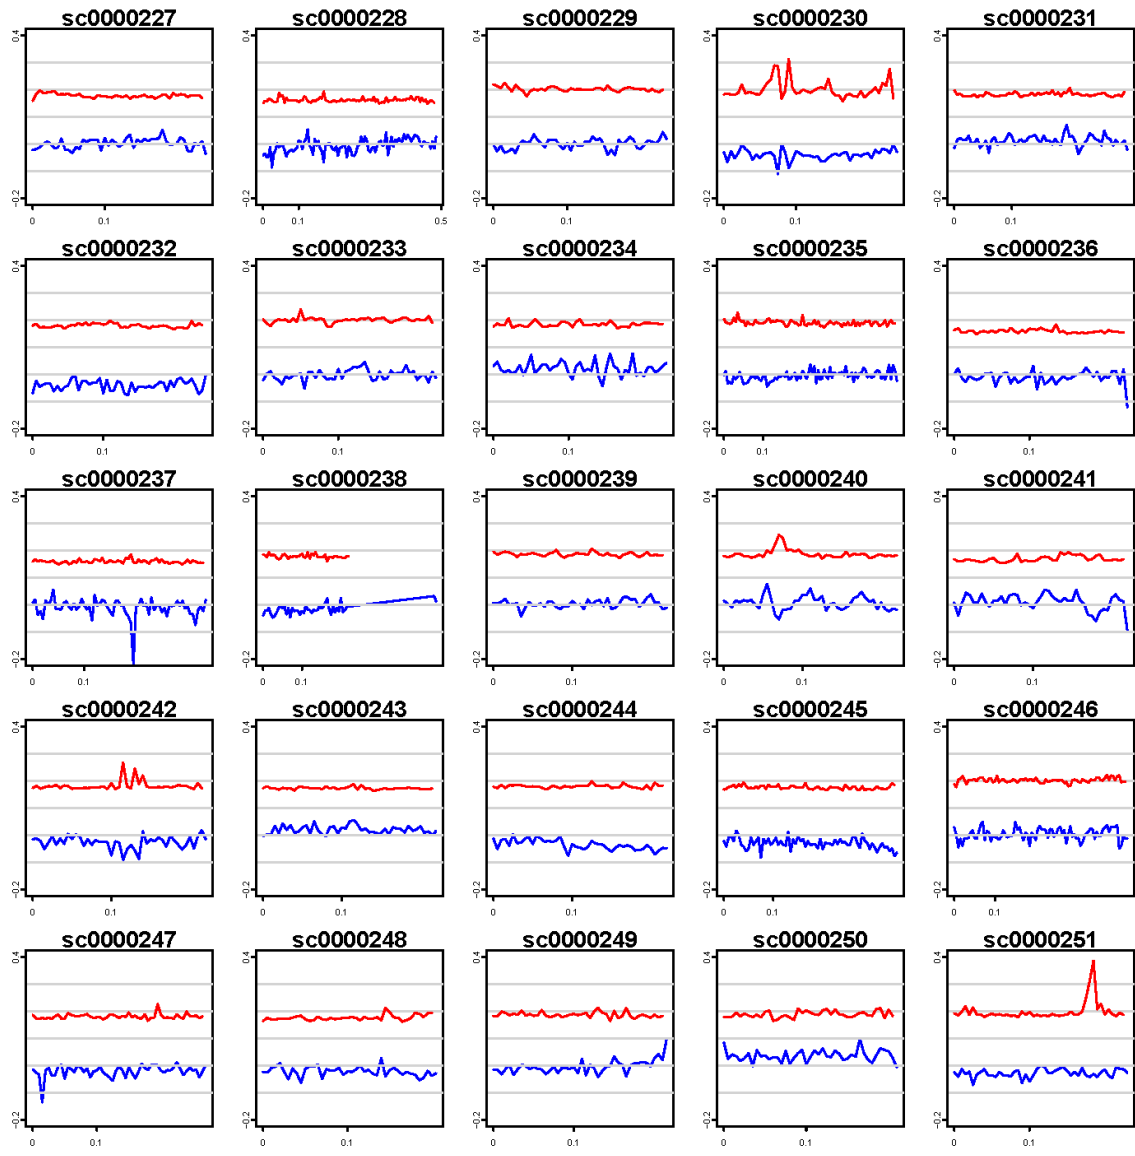

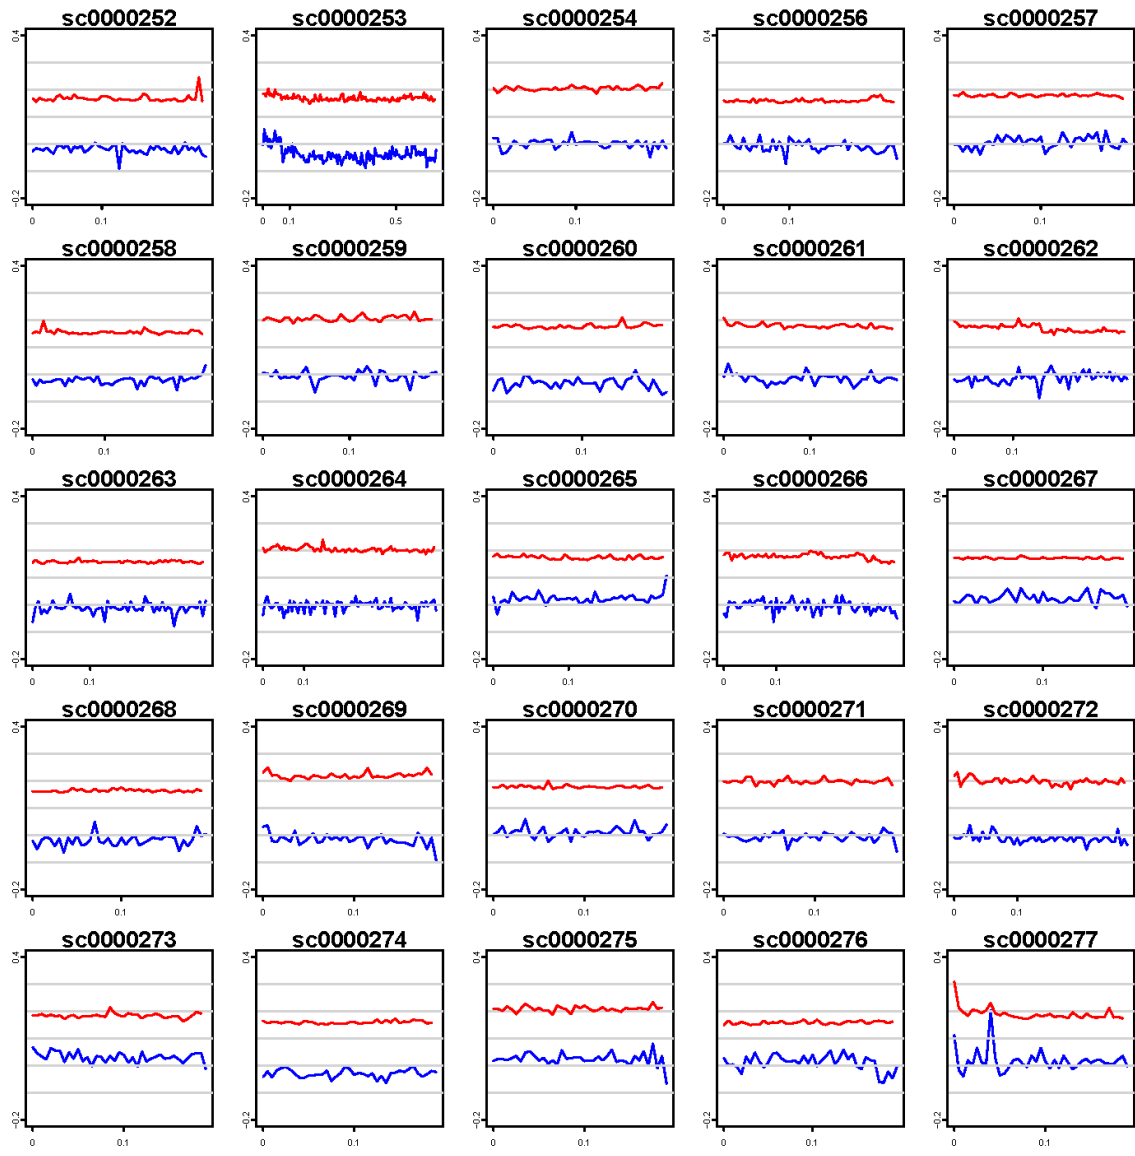

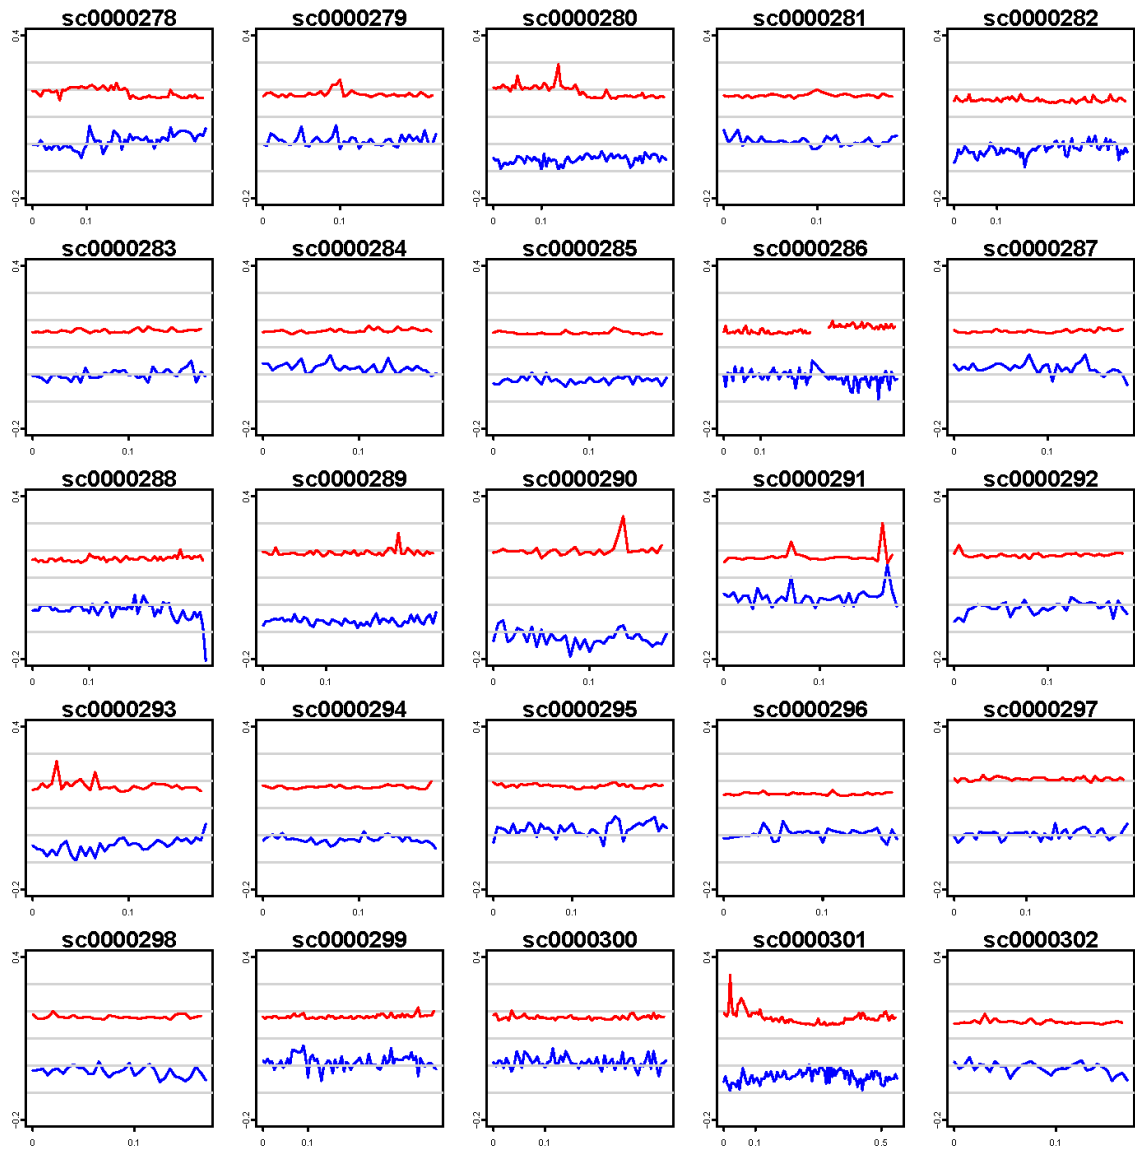



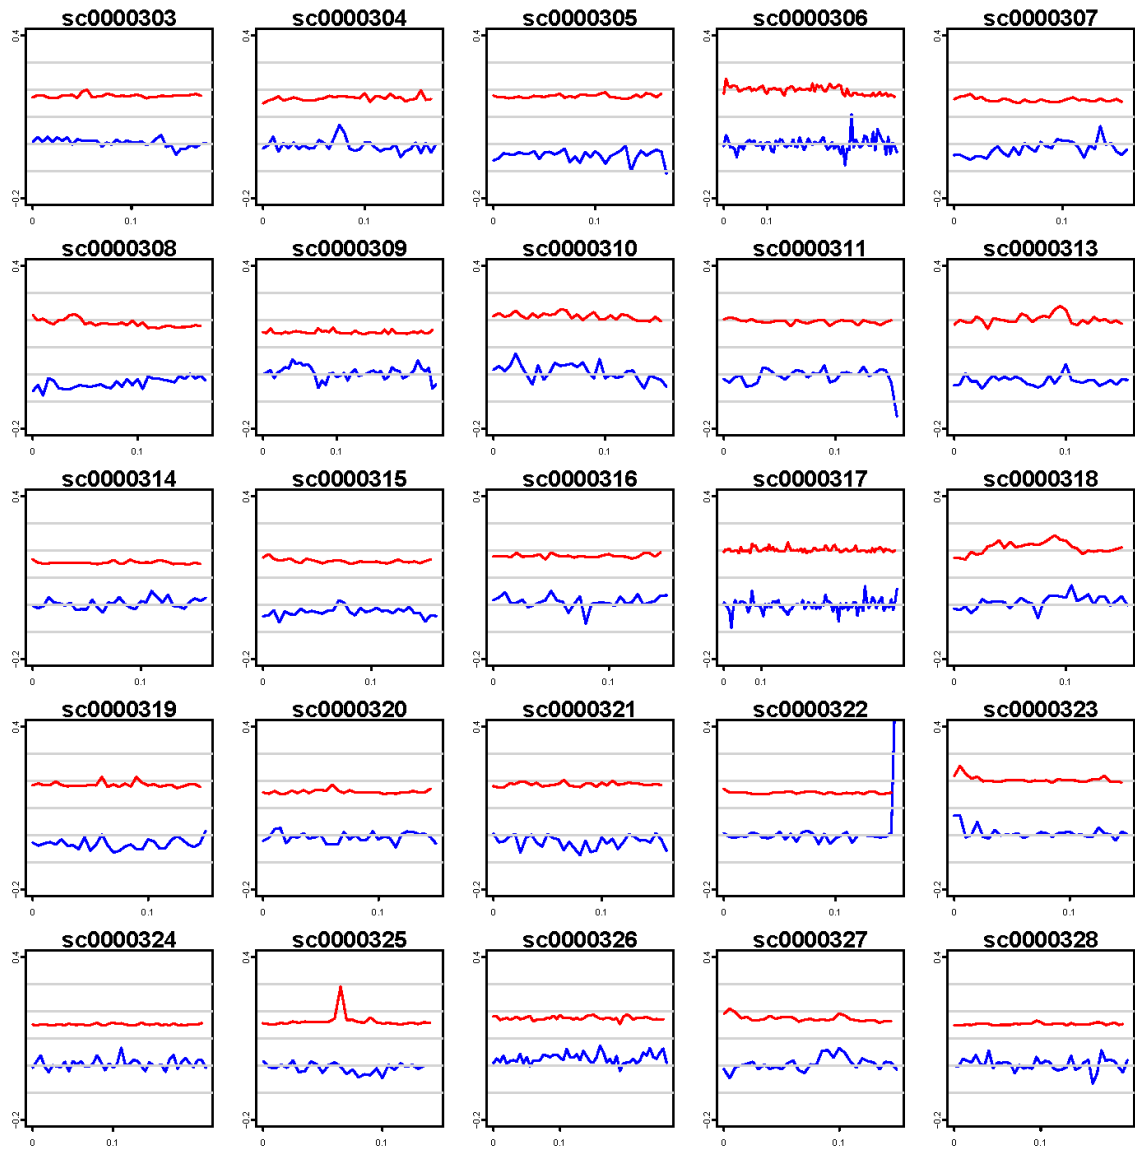

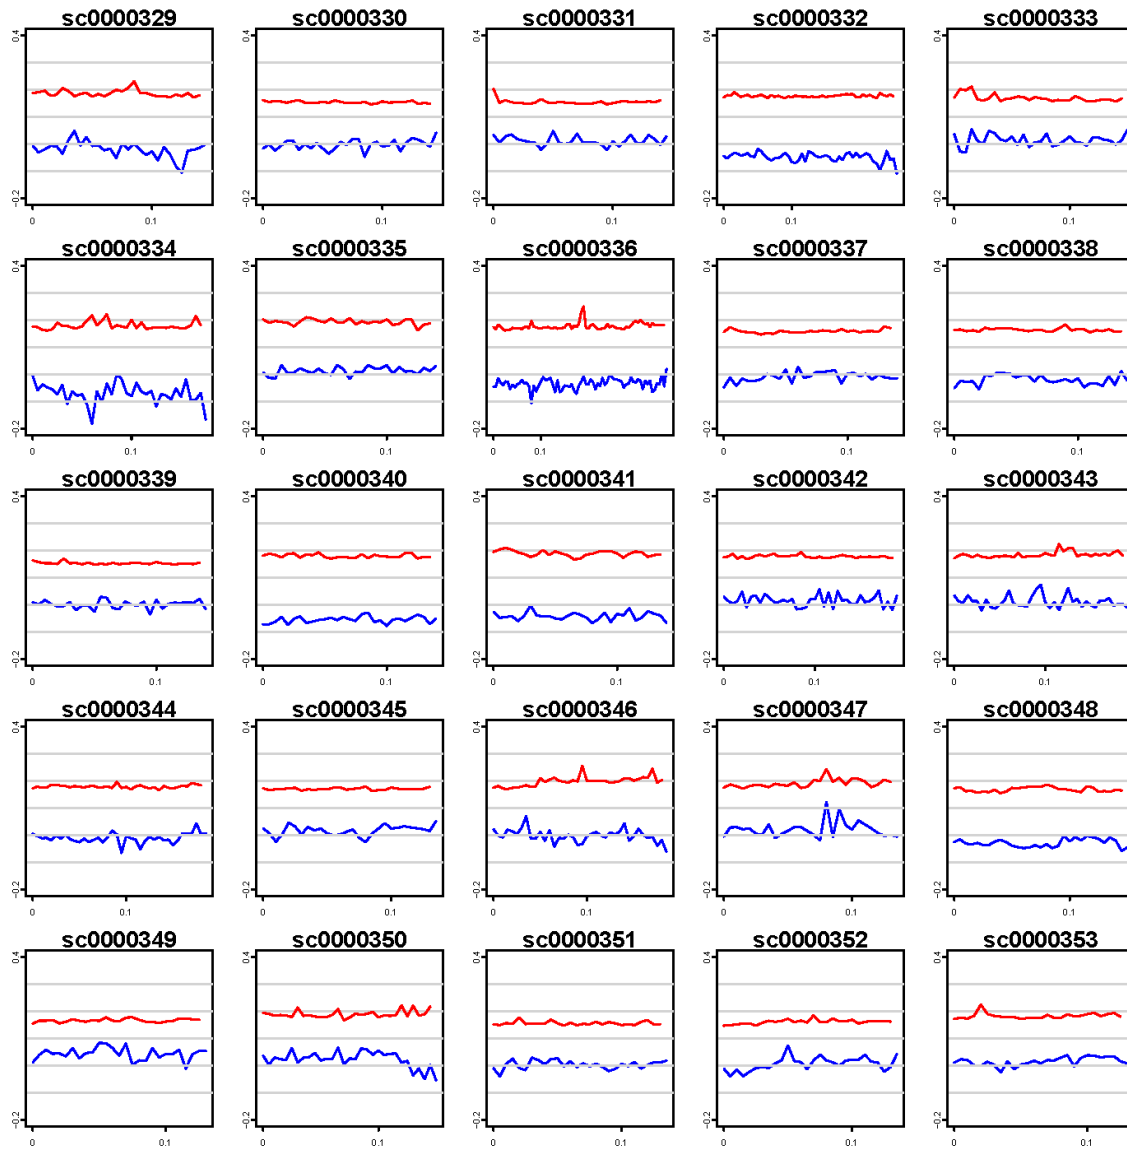

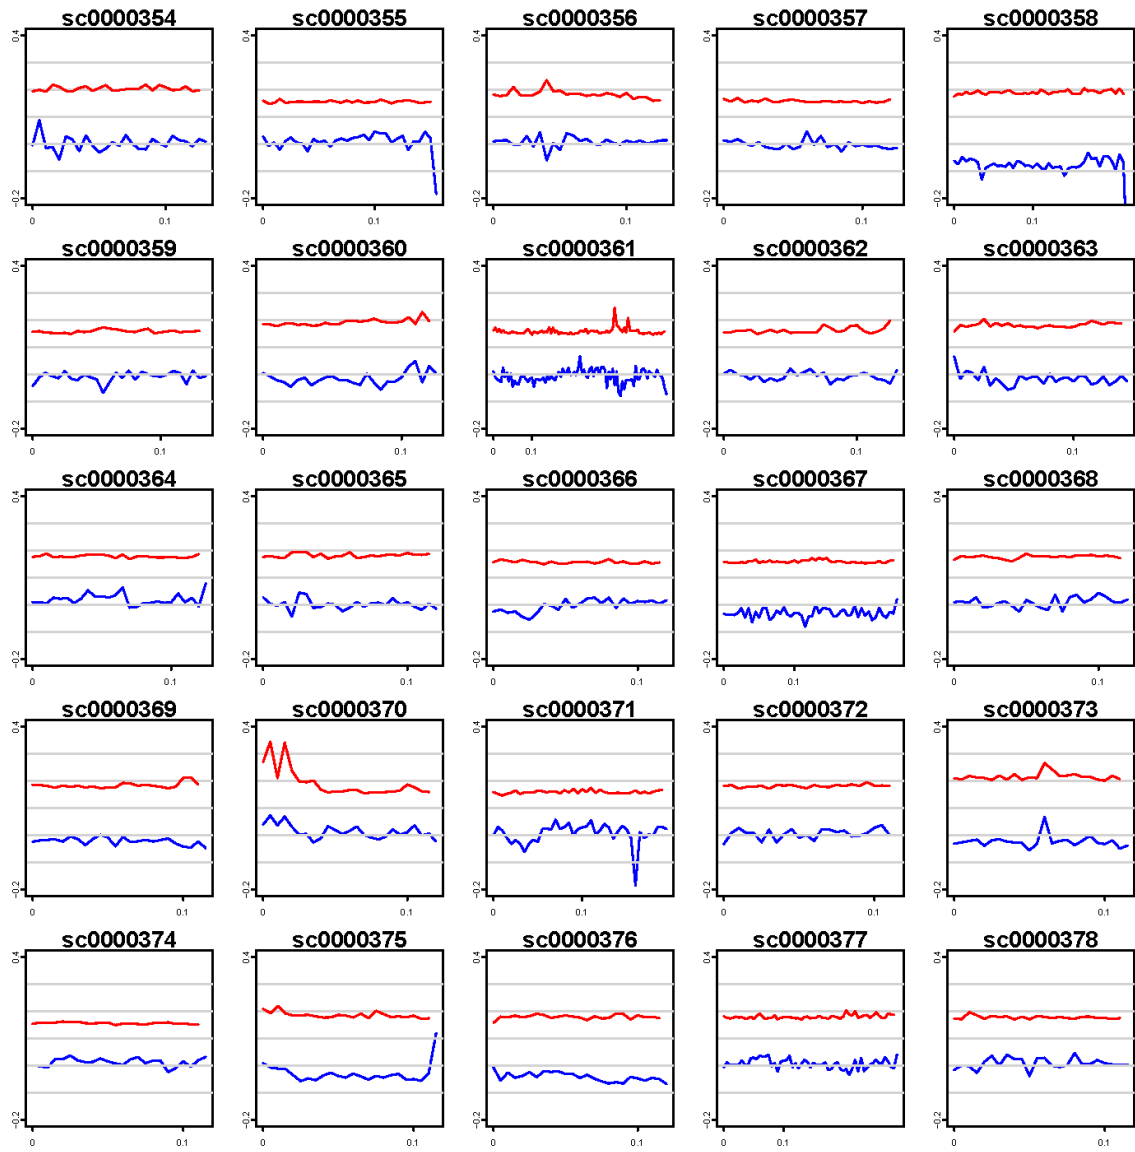

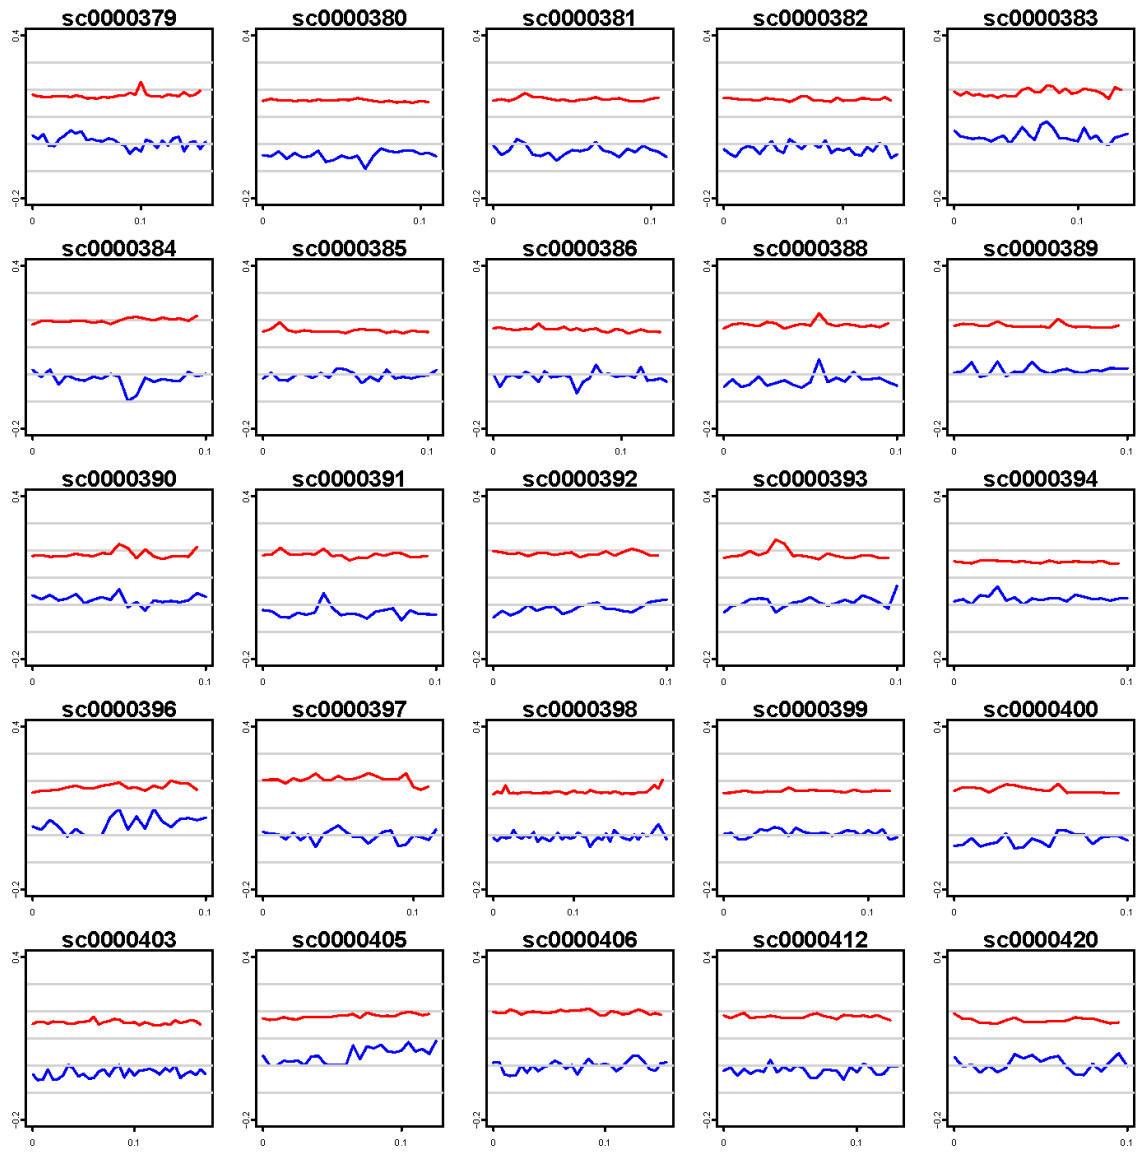

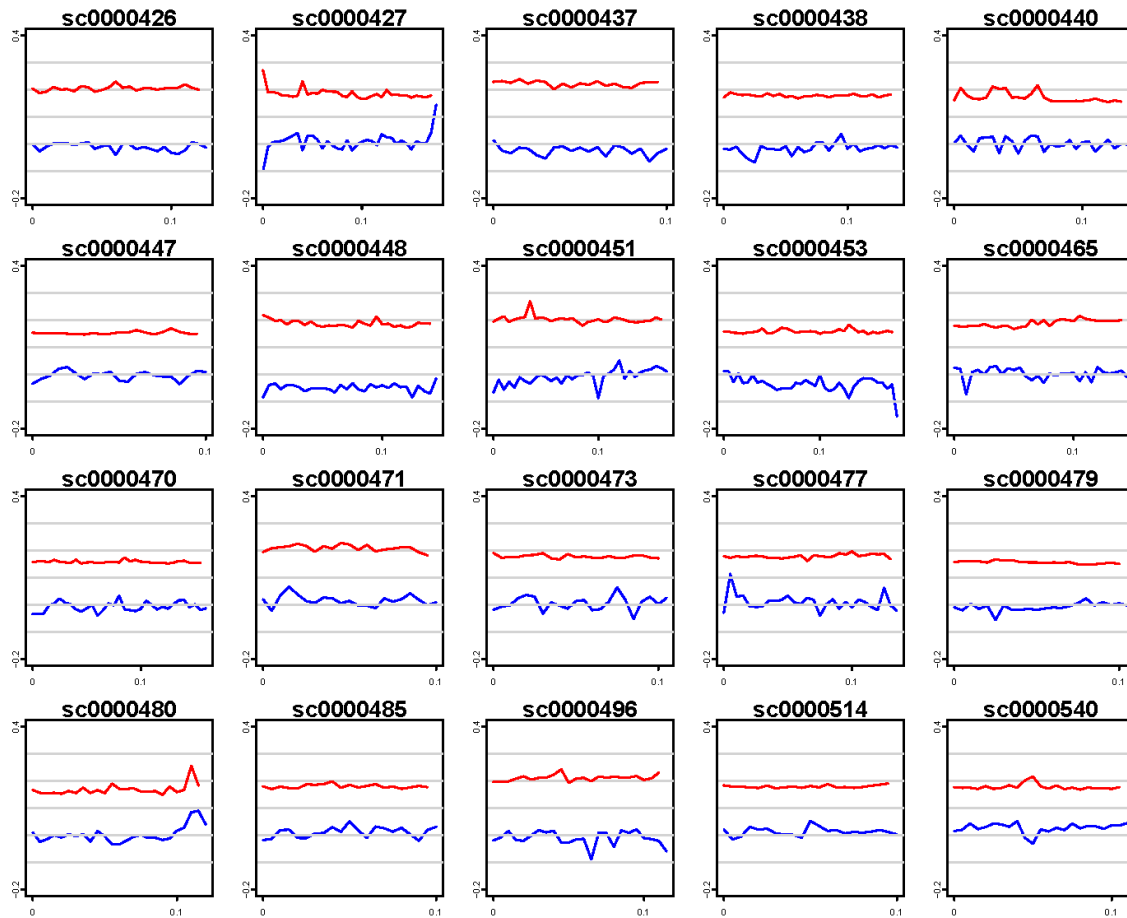

**Figure S4: Linkage disequilibrium (blue) and  $F_{st}$  (red) for the 420 scaffolds > 100 kb.** The first graph (“engrailed”) represents the scaffold containing the engrailed locus. engrailed: LD and  $F_{st}$  for the scaffold containing the *engrailed-inverted* locus. Horizontal scale is in million base pair.

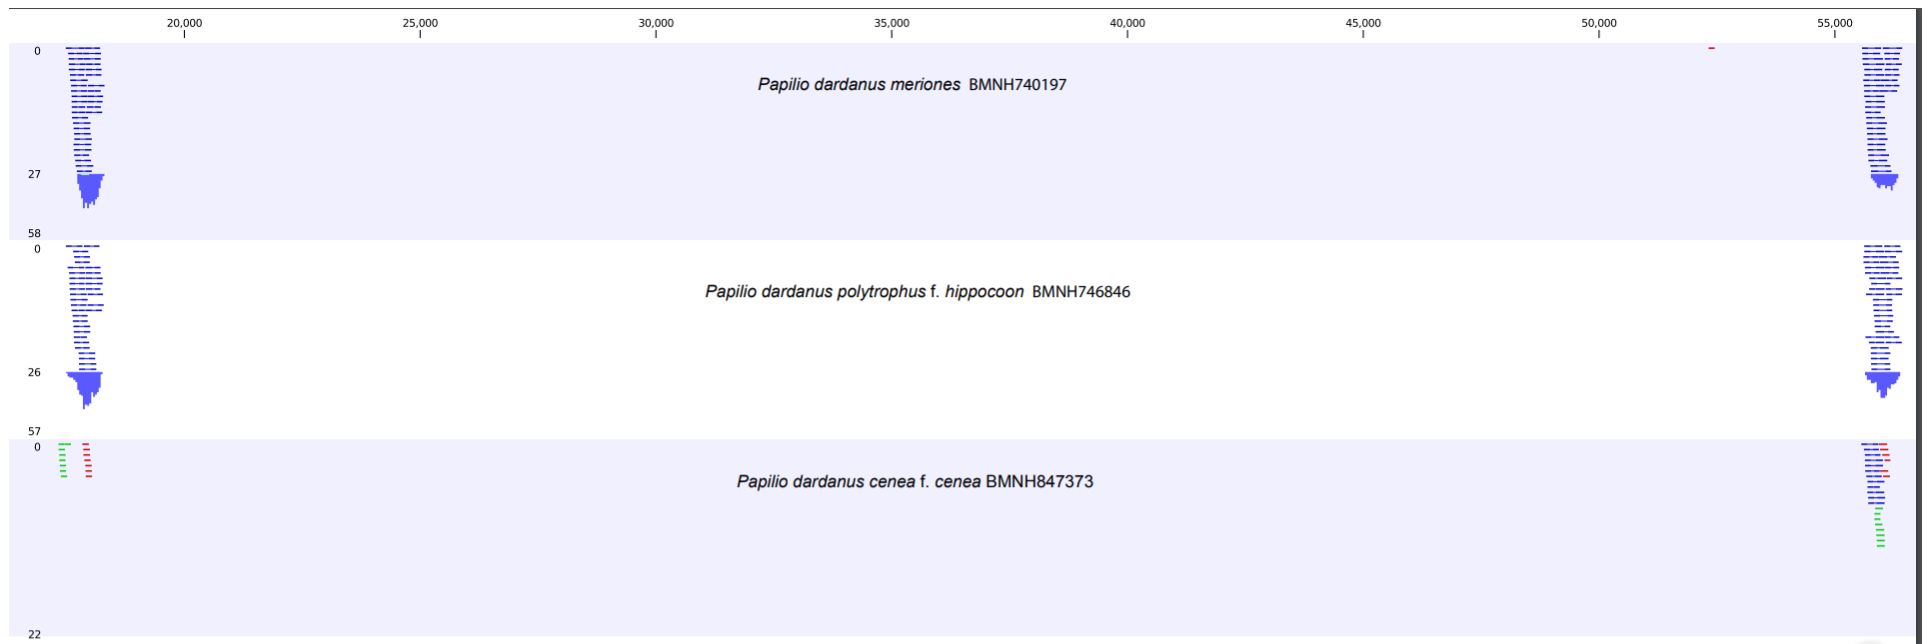

**Figure S5: Reads mapping near the inversion breakpoint.** Top: *Papilio dardanus meriones* ('male-like'), Middle: *Papilio dardanus* f. *hippococonides*, Bottom: *Papilio dardanus* f. *cenea*. Reads are mapped to the f. *hippococonides* based draft genome sequence. Correctly placed reads ( $\rightarrow \leftarrow$ ) are indicated in blue. Distant and oppositely-oriented placed paired reads ( $\rightarrow \rightarrow$  or  $\leftarrow \leftarrow$ ) are indicated in green and red. Numbers at the left indicate coverage.

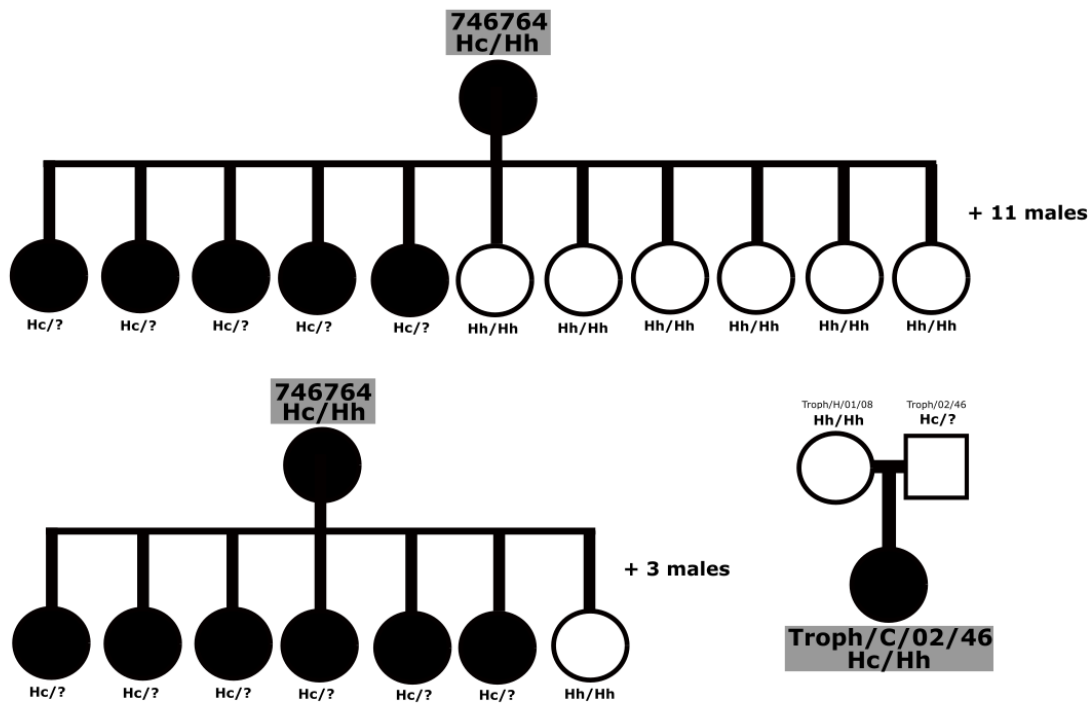

Figure S6: Laboratory cross details on the three heterozygous ( $H_c/H_h$ ) *P. dardanus polytrophus f. cenea* used for whole genome shotgun sequencing.

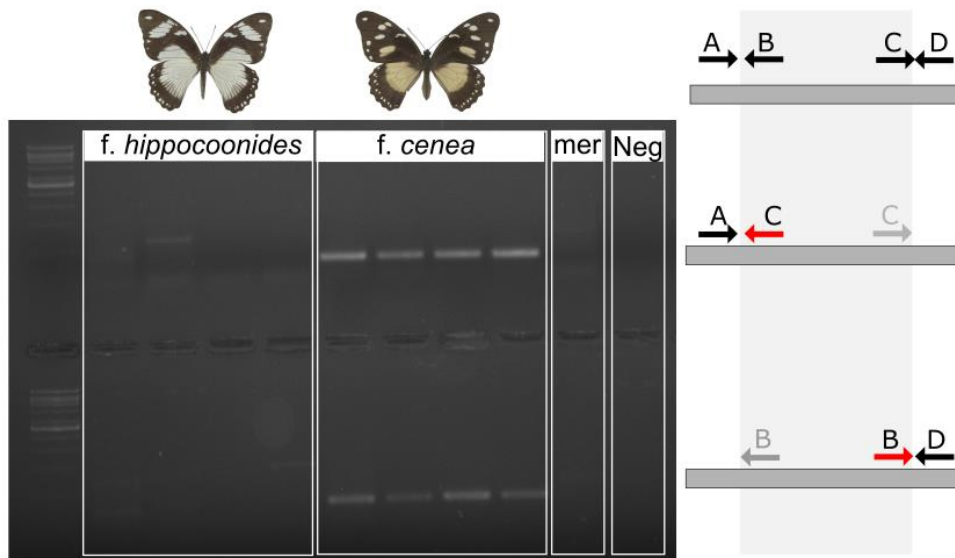

**Figure S7: PCR validation of inversions using females of two forms (*f. hippocooides* and *f. cenea*).** The *P. dardanus meriones* specimen used for whole genome shotgun sequencing is also included (“mer”). Primer combinations are given on the right.



## microRNA 2768 (miR-2768)

*Papilio dardanus* ATCAGGCGCCGGTGCAATATTTGACCAATTTTATAGCA---AACAATCGCTATAGCAAATGTGAATTGGTTAAGATAATGCATCGCCCGCTTGACT  
*Bombyx mori* (NR\_107338) GTCGGCGACCGGTGAATATATTTGACCAATTTTATAATCGCTCGATCG--TCAATCAAAGTGAATTGGTTAAGATAATGCATCGTTCCTGATC

**Figure S8: Sequence of microRNA 2768 located in the intronic region of *invected*.** miR-2768 is Lepidoptera specific and has been shown to interact with *cubitus interruptus*. Top: Sequence of *Papilio dardanus*, Bottom: Sequence of *Bombyx mori* (Genbank accession number: NR\_107338).

**Table S1. Completeness of the assembly as estimated using BUSCO version 3 compared to various recently published genomes.**

| <b>Species</b>          | <b>Number of scaffolds</b> | <b>N50</b> | <b>Total Length</b> | <b>BUSCO summary (%)</b>             | <b>BUSCO summary (absolute)</b>       |
|-------------------------|----------------------------|------------|---------------------|--------------------------------------|---------------------------------------|
| <i>Papilio dardanus</i> | <b>7,365</b>               | 596,599    | 231,123,043         | C:89.3%[D:0.7%],F:7.0%,M:3.7%,n:2442 | C: 2180 [D:16], F:172, M: 90, n:2,442 |
| <i>Papilio glaucus</i>  | <b>60,470</b>              | 230,841    | 374,815,656         | C:92.2%[D:0.9%],F:5.6%,M:2.2%,n:2442 | C: 2230 [D:22], F:136, M: 54, n:2,442 |
| <i>Papilio machaon</i>  | <b>63,187</b>              | 1,174,287  | 278,436,446         | C:91.5%[D:1.0%],F:5.9%,M:2.6%,n:2442 | C: 2234 [D:25], F:143, M: 65, n:2,442 |
| <i>Papilio memnon</i>   | <b>11,084</b>              | 5,456,730  | 232,544,191         | C:94.9%[D:1.1%],F:3.1%,M:2.0%,n:2442 | C: 2317 [D:26], F:75, M: 50, n:2,442  |
| <i>Papilio polytes</i>  | <b>3,874</b>               | 3,672,263  | 227,021,014         | C:88.1%[D:0.3%],F:5.9%,M:6.0%,n:2442 | C: 2152 [D:8], F:143, M: 147, n:2,442 |
| <i>Papilio xuthus</i>   | <b>5,572</b>               | 6,198,915  | 243,890,167         | C:96.1%[D:1.3%],F:1.2%,M:2.7%,n:2442 | C: 2347 [D:31], F:30, M: 65, n:2,442  |

**Table S2. Information on *Papilio dardanus* samples used in this study.**

|                                 | BIOLOGICAL SAMPLE                                           | SOURCE                   | VOUCHER NUMBER | YEAR COLLECTED |
|---------------------------------|-------------------------------------------------------------|--------------------------|----------------|----------------|
| Draft Genome Sequencing         | <i>Papilio dardanus tibullus</i> (inbred male)              | Laboratory bred specimen | BMNH1043181    | X              |
| WGS sequencing                  | <i>Papilio dardanus polytrophus</i> f. <i>hippocoonides</i> | Kenya, via ABRI          | BMNH746826     | 2002           |
|                                 | <i>Papilio dardanus polytrophus</i> f. <i>hippocoonides</i> | Kenya, via ABRI          | BMNH746846     | 2003           |
|                                 | <i>Papilio dardanus polytrophus</i> f. <i>hippocoonides</i> | Kenya, via ABRI          | BMH746848      | 2003           |
|                                 | <i>Papilio dardanus cenea</i> f. <i>hippocoonides</i>       | South-Africa             | BMNH847389     | 2013           |
|                                 | <i>Papilio dardanus polytrophus</i> f. <i>cenea</i>         | Kenya, via ABRI          | BMNH746453     | 2002           |
|                                 | <i>Papilio dardanus polytrophus</i> f. <i>cenea</i>         | Kenya, via ABRI          | BMNH746764     | 2003           |
|                                 | <i>Papilio dardanus polytrophus</i> f. <i>cenea</i>         | Laboratory bred specimen | Troph-c-02-46  | X              |
|                                 | <i>Papilio dardanus cenea</i> f. <i>cenea</i>               | South-Africa             | BMNH847353     | 2013           |
|                                 | <i>Papilio dardanus meriones</i>                            | Madagascar               | BMNH740197     | 2003           |
| Validation of inversion via PCR | <i>Papilio dardanus</i> f. <i>hippocoonides</i>             | Kenya, via ABRI          | BMNH746615     | 2003           |
|                                 | <i>Papilio dardanus</i> f. <i>hippocoonides</i>             | Kenya, via ABRI          | BMNH746616     | 2003           |
|                                 | <i>Papilio dardanus</i> f. <i>hippocoonides</i>             | Kenya, via ABRI          | BMNH746618     | 2003           |
|                                 | <i>Papilio dardanus tibullus</i> f. <i>hippocoonides</i>    | Laboratory bred specimen | BMNH746650     | X              |
|                                 | <i>Papilio dardanus</i> f. <i>cenea</i>                     | Kenya, via ABRI          | BMNH746747     | 2002           |
|                                 | <i>Papilio dardanus</i> f. <i>cenea</i>                     | Kenya, via ABRI          | BMNH746624     | 2003           |
|                                 | <i>Papilio dardanus</i> f. <i>cenea</i>                     | Kenya, via ABRI          | BMNH746619     | 2003           |
|                                 | <i>Papilio dardanus</i> f. <i>cenea</i>                     | Kenya, via ABRI          | BMNH746627     | 2003           |
| RADseq - Brood 48               | Parent Brood 48                                             | Laboratory bred specimen | BMNH1041083    | X              |
|                                 | Parent Brood 48                                             | Laboratory bred specimen | BMNH1041077    | X              |
| RADseq - Brood 59               | Parent Brood 59                                             | Laboratory bred specimen | BMNH1041063    | X              |
|                                 | Parent Brood 59                                             | Laboratory bred specimen | BMNH1041081    | X              |

**Table S3: Fisher exact tests for association between inversion and phenotype.**

*P. dardanus f. hippocoonides* vs *P. dardanus f. cenea*

|                                     | no inversion | inversion |
|-------------------------------------|--------------|-----------|
| <i>f. hippocoonides</i> (recessive) | 9*           | 0         |
| <i>f. cenea</i>                     | 0            | 8**       |

two tailed p value

<0.0001

\*) 5 Illumina shotgun sequence data + 4 PCR based.

\*\*\*) 4 Illumina shotgun sequence data sequenced + 4 PCR based.

**Table S4: Voucher numbers of specimens from brood 48 and brood 59 that show evidence for genetic recombination near *engrailed*. Positions of SNPs (along merged scaffold) in-between which recombination occurred are given.**

| Brood | Voucher number | SNP1    | SNP2    |
|-------|----------------|---------|---------|
| 48    | BMNH1043214    | 1155503 | 1644533 |
|       | BMNH1043229    | 1996091 | 2183720 |
| 59    | BMNH1043209    | 195408  | 308710  |
|       | BMNH1043194    | 777466  | 777466  |
|       | BMNH1043200    | 1025647 | 1148751 |
|       | BMNH1043155    | 1742876 | 1836404 |
|       | BMNH1043204    | 1742876 | 1836404 |
|       | BMNH1043207    | 1742876 | 1836404 |
|       | BMNH1043244    | 1742876 | 1836404 |
